RESEARCH ARTICLE

# The effect of Fe<sub>2</sub>O<sub>3</sub> crystal phases on CO<sub>2</sub> hydrogenation

Wensheng Ning<sup>1\*</sup>, Tianqi Wang<sup>1</sup>, Hongxian Chen<sup>1</sup>, Xiazhen Yang<sup>1</sup>, Yangfu Jin<sup>2</sup>

**1** College of Chemical Engineering, Zhejiang University of Technology, Hangzhou, China, **2** College of Materials Science and Technology, Zhejiang University of Technology, Hangzhou, China

\* [wenshning@sohu.com](mailto:wenshning@sohu.com)

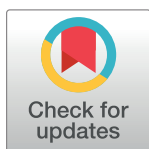

## Abstract

The effect of Fe<sub>2</sub>O<sub>3</sub> crystal phases on their performance in CO<sub>2</sub> hydrogenation was studied. α-Fe<sub>2</sub>O<sub>3</sub> crystal was prepared by precipitation method from Fe(NO<sub>3</sub>)<sub>3</sub>·9H<sub>2</sub>O and (NH<sub>4</sub>)<sub>2</sub>CO<sub>3</sub>, and γ-Fe<sub>2</sub>O<sub>3</sub> was prepared by grinding Fe(NO<sub>3</sub>)<sub>3</sub>·9H<sub>2</sub>O and L(+)-Tartaric acid in agate mortar completely. The crystal phases of Fe<sub>2</sub>O<sub>3</sub> influence the distribution of promoter Zn, K and Cu on catalysts. The dispersity of K on γ-Fe<sub>2</sub>O<sub>3</sub> surface is higher than α-Fe<sub>2</sub>O<sub>3</sub>. On the contrary, Cu and Zn are more dispersive on α-Fe<sub>2</sub>O<sub>3</sub> surface than γ-Fe<sub>2</sub>O<sub>3</sub>. The catalyst in γ-Fe<sub>2</sub>O<sub>3</sub> phase is easily reduced relative to the catalyst in α-Fe<sub>2</sub>O<sub>3</sub> phase. The former presents higher CO<sub>2</sub> conversion and C<sub>2+</sub> hydrocarbon selectivity than the latter in CO<sub>2</sub> hydrogenation.

## OPEN ACCESS

**Citation:** Ning W, Wang T, Chen H, Yang X, Jin Y (2017) The effect of Fe<sub>2</sub>O<sub>3</sub> crystal phases on CO<sub>2</sub> hydrogenation. PLoS ONE 12(8): e0182955. <https://doi.org/10.1371/journal.pone.0182955>

**Editor:** Yogendra Kumar Mishra, Institute of Materials Science, GERMANY

**Received:** April 17, 2017

**Accepted:** July 27, 2017

**Published:** August 14, 2017

**Copyright:** © 2017 Ning et al. This is an open access article distributed under the terms of the [Creative Commons Attribution License](https://creativecommons.org/licenses/by/4.0/), which permits unrestricted use, distribution, and reproduction in any medium, provided the original author and source are credited.

**Data Availability Statement:** All relevant data are within the paper and its Supporting Information files.

**Funding:** This work was supported by the Zhejiang Provincial Natural Science Foundation of China (LY14B030003) and the National Ministry of Science and Technology of China (2014BAD02B05). The funders had no role in study design, data collection and analysis, decision to publish, or preparation of the manuscript.

**Competing interests:** The authors have declared that no competing interests exist.

## Introduction

CO<sub>2</sub> hydrogenation for organic chemicals is a worthy study under the background that CO<sub>2</sub> used as raw material for chemicals other than discharged into atmosphere would be helpful to abate the greenhouse effect. However, the difficulty to capture CO<sub>2</sub> and the cost to supply H<sub>2</sub> make most of the researches stayed in laboratory. The concept and trial using seawater as starting materials brings an applicable and profitable scene to CO<sub>2</sub> hydrogenation [1–4]. Seawater is a natural absorbent of CO<sub>2</sub>, from which plenty of CO<sub>2</sub> can be captured. Seawater is an unlimited source for H<sub>2</sub>, too. The above concept becomes accepted to us because the device to transfer solar power into electricity can be constructed on the vast ocean, which would supply enough energy to produce CO<sub>2</sub> and H<sub>2</sub> from seawater simultaneously. With the concept breakthrough where and how to perform CO<sub>2</sub> hydrogenation, active catalysts are the key component to commercialize CO<sub>2</sub> hydrogenation.

The organic chemicals synthesized from CO<sub>2</sub> hydrogenation include methane, methanol, methyl acid, dimethyl ether, hydrocarbons and mixed alcohols [5–7]. Among them, hydrocarbons are a good product because it can be upgraded into liquid fuels which are cleaner than the petroleum-based fuels [8]. It is accepted that CO<sub>2</sub> is hydrogenated into hydrocarbons by two steps: CO is produced from CO<sub>2</sub> by reverse Water-Gas shift (WGS) reaction (Reaction I), then the CO reacts with H<sub>2</sub> to synthesize hydrocarbons via Fischer-Tropsch synthesis (FTS)

(Reaction II) [9–14].

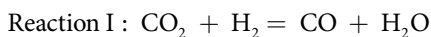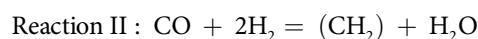

Fe and Co are commercial catalysts for FTS. Riedel et al. [15] compared the performance of Fe and Co catalysts in the mixtures of CO, CO<sub>2</sub>, and H<sub>2</sub>. With increased CO<sub>2</sub> and decreased CO content in the feedgas, the product composition shifted from a mixture of mainly higher hydrocarbons to almost exclusively methane for Co catalyst, while Fe catalyst synthesized the same hydrocarbon products from CO<sub>2</sub>/H<sub>2</sub> as from CO/H<sub>2</sub> syngas. Zhang et al. [16] also found that the CO<sub>2</sub> hydrogenation products contained about 70% or more methane for supported Co catalyst. These distinctions are partly attributed to that Fe catalyst is active for both of the Reaction I and II [15,17,18].

In order to improve the performance of Fe catalysts in CO<sub>2</sub> hydrogenation, the effects of promoter [8,10,13,15,19–24], supporter [15,20,22,24,25], preparation method [8,13,15,21–26] and reducing agent [8] are studied very much. In these studies, iron oxide almost presents in  $\alpha$ -Fe<sub>2</sub>O<sub>3</sub> [15,21,26] or Fe<sub>3</sub>O<sub>4</sub> [25] crystal phase in the as-prepared catalysts. Considering that  $\gamma$ -Fe<sub>2</sub>O<sub>3</sub> is one kind of iron oxide as common as  $\alpha$ -Fe<sub>2</sub>O<sub>3</sub> [27,28], it is surprising that there are very few reports about the behavior of  $\gamma$ -Fe<sub>2</sub>O<sub>3</sub> in CO<sub>2</sub> hydrogenation. Al-Dossary et al. found  $\gamma$ -Fe<sub>2</sub>O<sub>3</sub> coexisted with  $\alpha$ -Fe<sub>2</sub>O<sub>3</sub> in the catalysts, but no benefit from  $\gamma$ -Fe<sub>2</sub>O<sub>3</sub> was disclosed [21]. However, it has been confirmed that  $\gamma$ -Fe<sub>2</sub>O<sub>3</sub> is superior to  $\alpha$ -Fe<sub>2</sub>O<sub>3</sub> in other catalytic reactions, such as photodecomposition of H<sub>2</sub>S [29], selective catalytic reduction of NO<sub>x</sub> with NH<sub>3</sub> [30], electroanalysis and ultrasensitive detection of Pb<sup>2+</sup> [27], WGS reaction [31] and so on. The lack on the performance of  $\gamma$ -Fe<sub>2</sub>O<sub>3</sub> in CO<sub>2</sub> hydrogenation makes it necessary to study Fe catalyst in  $\gamma$ -Fe<sub>2</sub>O<sub>3</sub> phase, not only to supply the knowledge about  $\gamma$ -Fe<sub>2</sub>O<sub>3</sub> in the reaction, but also to find active catalyst to make CO<sub>2</sub> profitable.

We have reported the influences of Fe<sub>2</sub>O<sub>3</sub> crystal phases on CO<sub>2</sub> hydrogenation [32].  $\gamma$ -Fe<sub>2</sub>O<sub>3</sub> phase in the catalysts was formed by washing FeAl precipitate with anhydrous ethanol. The catalyst with strong  $\gamma$ -Fe<sub>2</sub>O<sub>3</sub> phase was more active in the reaction than the catalysts with none or weak  $\gamma$ -Fe<sub>2</sub>O<sub>3</sub> phase. In order to avoid the possible promotion of Al on the catalyst activity and prepare the catalyst in pure  $\gamma$ -Fe<sub>2</sub>O<sub>3</sub> phase simultaneously, solid-phase reaction was used recently for catalyst preparation. The effect of Fe<sub>2</sub>O<sub>3</sub> phase on the catalyst reactivity is explored in this work.

## Materials and methods

### Catalyst preparation

Three kinds of catalyst precursor were prepared. P-1 was prepared by precipitating Fe(NO<sub>3</sub>)<sub>3</sub>·9H<sub>2</sub>O solution with (NH<sub>4</sub>)<sub>2</sub>CO<sub>3</sub> solution under vigorous stirring at 50 °C and pH = 6.5. The resulting precipitate was aged at 50 °C for 0.5 h and room temperature for 1 h. After it was washed with distilled water and centrifuged for three times, the precipitate was dried at 120 °C overnight and calcined at 500 °C for 6 h in static air [32]. P-2 was prepared by grinding Fe(NO<sub>3</sub>)<sub>3</sub>·9H<sub>2</sub>O and L(+)-Tartaric acid (1:1 in mass ratio) in agate mortar completely. The obtained deep red solid was washed with dehydrated alcohol for three times. Then, the solid was dried at 80 °C for 3 h and calcined at 400 °C for 1 h. P-3 was prepared in the same procedure as P-2 except some water was added during the grinding. The precursors were shaped into particles of 150–280 μm and impregnated with Zn, K and Cu in the mass ratio of 2%, 3% and 4%, respectively. After the impregnated precursors were dried at 120 °C for 12 h, the impregnated P-1 was calcined at 500 °C for 6 h, while the impregnated

P-2 and P-3 were calcined at 400°C for 1 h. The promoted catalysts were named as C-1, C-2 and C-3 correspondingly.

## Characterization

The crystal structure of the catalysts was acquired by X-ray diffraction (XRD, PANalytical X'Pert Pro diffractometer) with a Cu K<sub>α</sub> radiation source ( $\lambda = 0.15406$  nm) in reflection mode. X-ray tube was operated at 40 kV and 40 mA. Surface area and pore structure of the samples were measured by ASAP-2020 from Micromeritics at liquid nitrogen temperature. Temperature-programmed reduction (TPR) was carried out in PX200 (Tianjin Pengxiang LTD.) with 5% H<sub>2</sub>/N<sub>2</sub> of 30 mL/min and a TCD detector. The sample was heated to 850°C at the rate of 10°C/min. The morphology of the catalysts was observed by scanning electron microscopy (SEM, Hitachi S-4700II) which was attached with an energy dispersive spectroscopy (EDS, Thermo NORAN VANTAGE ESI.). The accelerating voltage is 15 kV. The results from SEM and EDS are shown in S1 and S2 Figs, respectively. XPS analysis was done at Catalysis and Surface Science End-station of National Synchrotron Radiation Laboratory in University of Science & Technology of China using Mg K<sub>α</sub> radiation (1253.6 eV) and VG SCIENTA R4000 analyzer. The binding energy of C 1s (285.0 eV) was used to calibrate the peak position of other elements.

## Activity test and product analysis

The reactivity of catalysts was tested in a stainless steel fixed bed reactor of inter-diameter of 8 mm [19]. A 1.0 g catalyst (150–280 μm) was mixed with 4.0 g quartz sand and they were filled into the reactor. After the catalyst was reduced in CO of 3.0 L/(h·g-cat) at 300°C for 6 h, it was cooled to room temperature. Then, the feed gas was changed into mixed gases of H<sub>2</sub>:CO<sub>2</sub>:N<sub>2</sub> = 16:8:1 of 1.6 MPa and 6.0 L/(h·g-cat). The catalyst was heated to 230°C in about 3 h for activity evaluation of 45 h. The condensable products were collected in a cold trap of 0°C at system pressure. After the system pressure was released through a backpressure regulator, the exited gas was analyzed by GC A90 (Shanghai Yimeng LTD.) on line. The quantities of CO, CH<sub>4</sub>, CO<sub>2</sub> and N<sub>2</sub> were supplied with TCD detector and TDX-01 column. C<sub>1</sub>–C<sub>4</sub> hydrocarbons were analyzed with FID detector and Porapak Q column.

## Results and discussion

### Crystal phase of the precursors and catalysts

Fig 1 shows the XRD patterns of precursor P-1, P-2 and P-3. There is only  $\alpha$ -Fe<sub>2</sub>O<sub>3</sub> (PDF: 33–0664) detected in P-1, and only  $\gamma$ -Fe<sub>2</sub>O<sub>3</sub> (PDF: 39–1346) in P-3, while P-2 contains  $\alpha$ -Fe<sub>2</sub>O<sub>3</sub> and  $\gamma$ -Fe<sub>2</sub>O<sub>3</sub> phases simultaneously. Calculated with Scherer equation [33] based on 35.6° peak, the particle size is 32.2 nm (P-1), 17.7 nm (P-2) and 16.3 nm (P-3), respectively. The data indicates that the particle size in the precursor built by  $\gamma$ -Fe<sub>2</sub>O<sub>3</sub> is small.

Fig 2 is the XRD patterns of catalyst C-1, C-2 and C-3. The Fe<sub>2</sub>O<sub>3</sub> phases in them are the same as their precursors. The different crystal phases of Fe<sub>2</sub>O<sub>3</sub> influence the distribution of promoter Zn, K and Cu in C-1, C-2 and C-3. CuO (PDF: 48–1548) is found in C-1, while CuFe<sub>2</sub>O<sub>4</sub> (PDF: 25–0283) appears in C-2 and C-3. The dispersion of Cu in C-1 is lower than C-2 and C-3. The existing state of Cu is related to the particle size of Fe<sub>2</sub>O<sub>3</sub> in the precursors. Because the Fe<sub>2</sub>O<sub>3</sub> size of P-2 and P-3 is only about half of P-1, the dispersed degree of iron atom in P-2 and P-3 is much higher than P-1. The impregnated copper atom can contact with more iron atom in P-2 and P-3 than P-1, which is able to explain why CuFe<sub>2</sub>O<sub>4</sub> was formed in

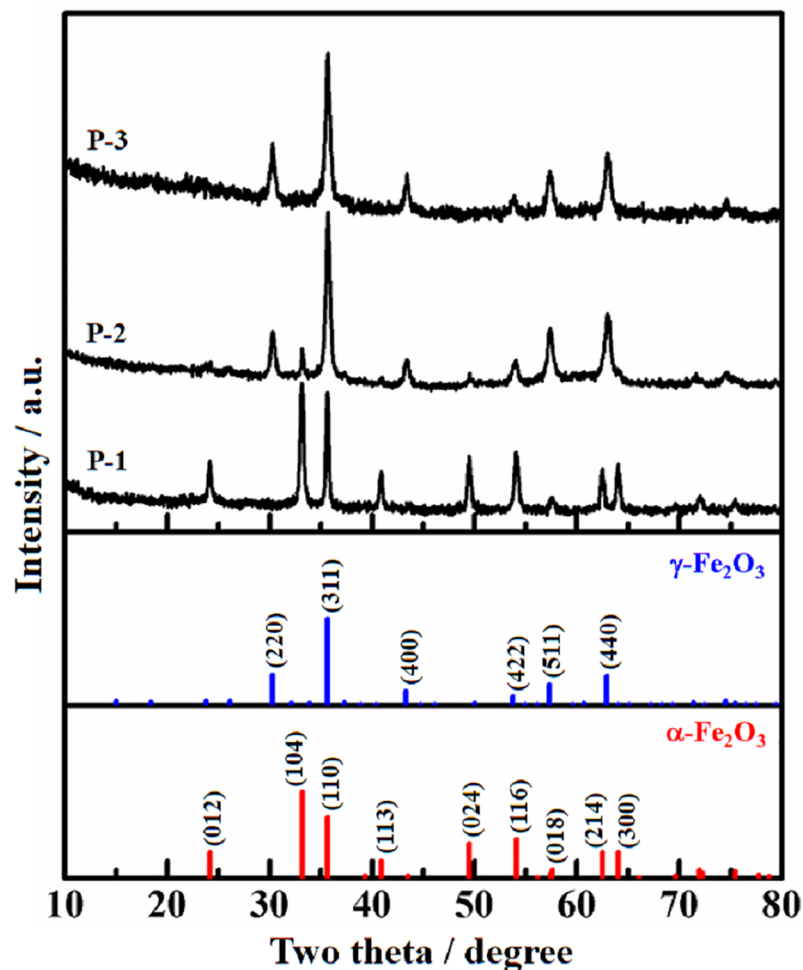

**Fig 1.** XRD patterns of the precursors, as well as the standard data for  $\alpha$ -Fe<sub>2</sub>O<sub>3</sub> and  $\gamma$ -Fe<sub>2</sub>O<sub>3</sub>.

<https://doi.org/10.1371/journal.pone.0182955.g001>

C-2 and C-3. Although the crystal containing Zn and (or) K is not detected in Fig 2, the existence of Zn and K in the catalysts is confirmed by XPS analysis.

### Texture of the precursors and catalysts

Table 1 lists the BET surface area and pore distribution of the precursors and catalysts measured by N<sub>2</sub>-adsorption at liquid nitrogen temperature. For the precursors, the specific surface area of P-2 and P-3 is bigger than P-1, which can partly be explained by the particle size of Fe<sub>2</sub>O<sub>3</sub> in them. Small particles usually constitute a collective with large surface area. However, the specific surface area of P-3 is less than P-2 regardless of the particle size in P-3 (16.3 nm) is smaller than P-2 (17.7 nm). This contradiction can be solved by the fact that the theoretical densities of  $\gamma$ -Fe<sub>2</sub>O<sub>3</sub> (5.47 g·cm<sup>-3</sup>) is higher than  $\alpha$ -Fe<sub>2</sub>O<sub>3</sub> (5.27 g·cm<sup>-3</sup>) [28]. According to Fig 1, P-2 is a mixture of  $\alpha$ -Fe<sub>2</sub>O<sub>3</sub> and  $\gamma$ -Fe<sub>2</sub>O<sub>3</sub>, while P-3 is composed of pure  $\gamma$ -Fe<sub>2</sub>O<sub>3</sub>. As a result, the volume per unit mass of P-2 is larger than P-3. It means that P-2 is in a looser state than P-3. Both of the average pore diameter and pore volume are in the order of P-1 > P-2 > P-3.

After the precursors were promoted, the specific surface area and pore volume of C-1, C-2 and C-3 were decreased except for the pore volume of C-3. There are two possible factors responsible for the changes. Water, used as solvent in the impregnation of promoters, is the first one.

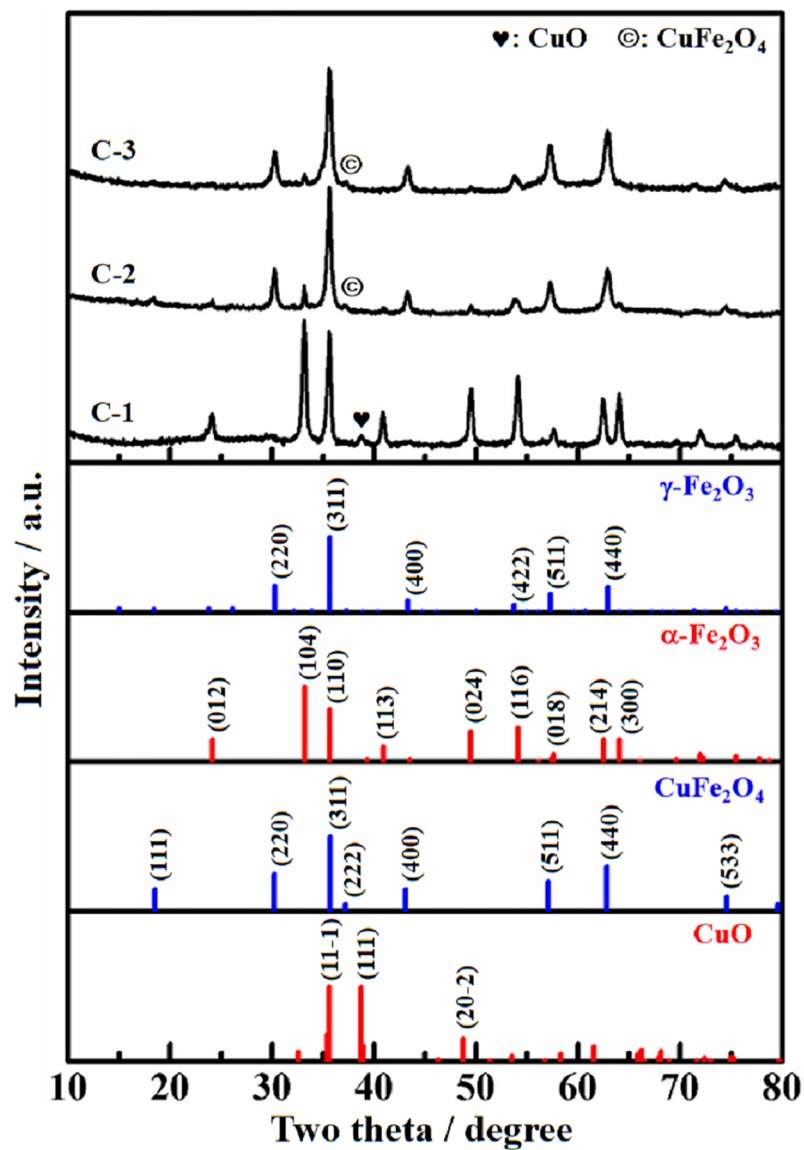

Fig 2. XRD patterns of the catalysts, as well as the standard data for CuO, CuFe<sub>2</sub>O<sub>4</sub>, α-Fe<sub>2</sub>O<sub>3</sub> and γ-Fe<sub>2</sub>O<sub>3</sub>.

<https://doi.org/10.1371/journal.pone.0182955.g002>

Table 1. Texture of the precursors and catalysts.

| Sample | BET surface area (m <sup>2</sup> /g) | Average pore diameter (nm) | Pore volume (mL/g) |
|--------|--------------------------------------|----------------------------|--------------------|
| P-1    | 32.4                                 | 20.6                       | 0.17               |
| P-2    | 60.2                                 | 9.7                        | 0.15               |
| P-3    | 55.1                                 | 5.8                        | 0.06               |
| C-1    | 19.6                                 | 29.0                       | 0.14               |
| C-2    | 34.6                                 | 14.2                       | 0.12               |
| C-3    | 30.0                                 | 11.6                       | 0.09               |

<https://doi.org/10.1371/journal.pone.0182955.t001>

Because water has high surface tension, pore structure, especially in small diameter, is destroyed when intrapore water is removed by drying [34]. It makes the loss of catalyst surface area. The second one is the distribution of promoter K in the catalysts. The radius of K<sup>1+</sup> (1.33 Å) is two times of Fe<sup>3+</sup> (0.64 Å). The impregnated K mainly distributes on the catalyst surface. It shrinks pore mouth, and even blocks off minor pores in catalyst. Thus, N<sub>2</sub> molecule is prevented to enter into the inner of these pores in the experiment of N<sub>2</sub> adsorption at low temperature. It results in small measured surface area and pore volume [32,35,36]. The morphologies of precursors and catalysts are shown in S1 Fig. There are large particles laying on C-1, which are confirmed to be K-containing particles by EDS (S2 Fig). The blocking to minor pores induces enlarged average pore diameter of the catalysts. S1 Fig also display that the surface of P-3 was fluffed after promoter impregnation, which is possible to induce abnormal increased pore volume of C-3.

### XPS characterization

Fig 3 gives the binding energy of Fe 2p in the precursors. The peaks of Fe 2p 3/2 and 2p 1/2 appears at 711.12 eV and 724.75 eV for the three precursors, respectively. The peak intensity of P-2 and P-3 is stronger than P-1, disclosing that the Fe quantity exposed on the surface of P-2 and P-3 is more than P-1. The deduction is supported by the results in Fig 1. The calculated particle size in P-1 is the largest among the three precursors. It results in the lowest surface content of Fe in P-1.

The XPS results of catalyst C-1, C-2 and C-3 are shown in Fig 4. By comparing the peak area of element Fe, K, Cu and Zn, the dispersity of Fe and K on C-2 and C-3 surface is higher than C-1. On the contrary, Cu and Zn are more dispersive on C-1 than C-3. There is no signal of Cu and Zn for C-2. Promoter K mainly distributed on catalyst surface because of its large radius (1.33 Å for K<sup>1+</sup> ion). From Table 1, the surface areas of C-2 and C-3 are bigger than C-1. It increases the ratio of Fe and K distributed on the catalyst surface. The radius of Zn<sup>2+</sup> and

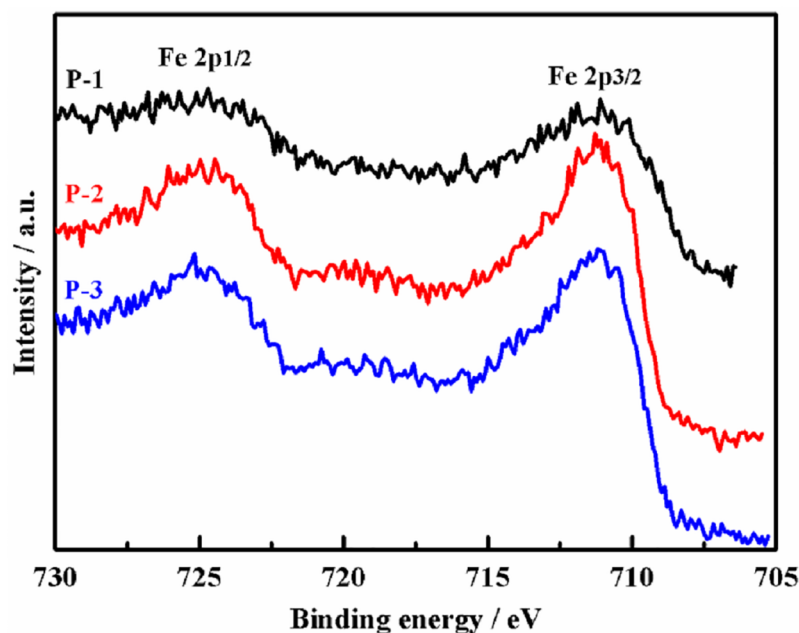

**Fig 3.** XPS spectrum of element Fe on the precursors.

<https://doi.org/10.1371/journal.pone.0182955.g003>

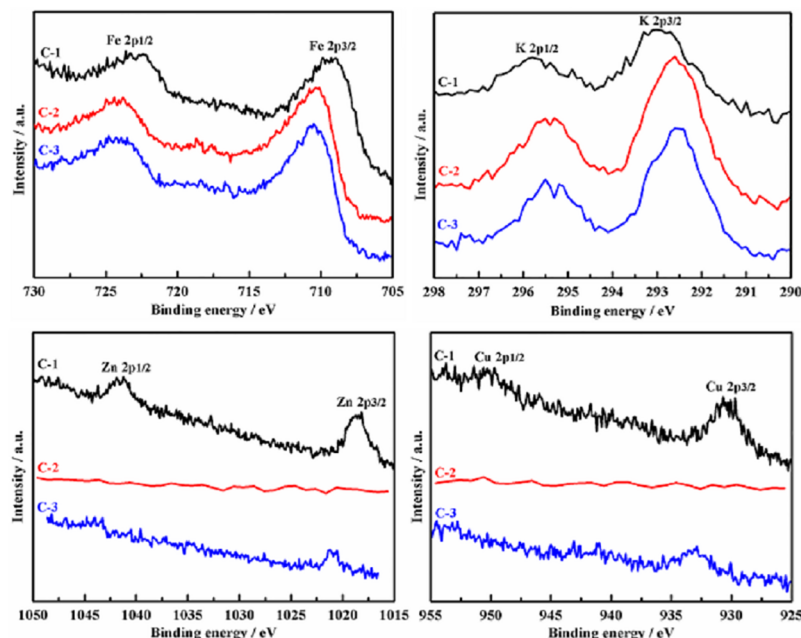

**Fig 4. XPS spectra of element Fe, K, Zn and Cu on the catalysts.**

<https://doi.org/10.1371/journal.pone.0182955.g004>

Cu<sup>2+</sup> is 0.74 Å and 0.72 Å, respectively. They are close to Fe<sup>3+</sup> (0.64 Å). Therefore, promoter Zn and Cu can enter into the cation vacancy or replace Fe<sup>3+</sup> in crystal Fe<sub>2</sub>O<sub>3</sub>. Because  $\gamma$ -Fe<sub>2</sub>O<sub>3</sub> is more disorder than  $\alpha$ -Fe<sub>2</sub>O<sub>3</sub>, it makes the inset of Cu and Zn into  $\gamma$ -Fe<sub>2</sub>O<sub>3</sub> easier than  $\alpha$ -Fe<sub>2</sub>O<sub>3</sub>. That is why the peak areas of Cu 2p and Zn 2p of C-3 are smaller than C-1. Due to the inserted Cu and Zn surrounded or interacted with much oxygen atom in C-3, their binding energies would be increased relative to C-1 which is reflected by the blue shift of Cu and Zn binding energy. C-2 is a mixture of  $\gamma$ -Fe<sub>2</sub>O<sub>3</sub> and  $\alpha$ -Fe<sub>2</sub>O<sub>3</sub>, and the mismatching between the two crystal phases produced much defective sites in C-2. Such disorder structure is beneficial to hold Cu and Zn in the bulk of catalysts. The assumption is supported by the observation of none of Cu 2p and Zn 2p signals for C-2 in Fig 4. Compared with the binding energy of Fe 2p 3/2 of the three precursors, the values of the three catalysts are decreased in the order of C-3  $\approx$  C-2 < C-1. Dry et al. [37] reported that K donates electrons to Fe. Therefore, a stronger electron shift from K to Fe happened in C-1 than C-2 and C-3.

## H<sub>2</sub>-TPR

Fig 5 displays the reducibility of the three precursors. The peak temperature corresponding to Fe<sub>2</sub>O<sub>3</sub>  $\rightarrow$  Fe<sub>3</sub>O<sub>4</sub> reduction is 340°C for P-1, while it is around 310°C for P-2 and P-3 [38,39]. Because  $\gamma$ -Fe<sub>2</sub>O<sub>3</sub> is similar to Fe<sub>3</sub>O<sub>4</sub> in view of their crystal structure [28,40],  $\gamma$ -Fe<sub>2</sub>O<sub>3</sub> is more easily reduced to Fe<sub>3</sub>O<sub>4</sub> than  $\alpha$ -Fe<sub>2</sub>O<sub>3</sub>. The weak peak at 350°C in P-3 is the reduction of  $\alpha$ -Fe<sub>2</sub>O<sub>3</sub> which was produced from meso-stable  $\gamma$ -Fe<sub>2</sub>O<sub>3</sub>. The peak corresponding to the reduction of Fe<sub>3</sub>O<sub>4</sub>  $\rightarrow$   $\alpha$ -Fe is about 550°C for P-2 and P-3, but 574°C for P-1 [38,39].

Fig 6 presents the reducibility of the three catalysts. The wild peak below 350°C in C-1 is assigned to the reduction of CuO  $\rightarrow$  Cu<sup>0</sup> [32]. The data in Figs 2 and 4 disclose that Cu is highly dispersed into C-2 and C-3. Therefore, there is no evident reduction peak of CuO species for C-2 and C-3. A weak peak around 270°C appears in C-3 rather than C-2 is consistent with the observed Cu signal in C-3 and none in C-2 (Fig 4). The impregnated promoters

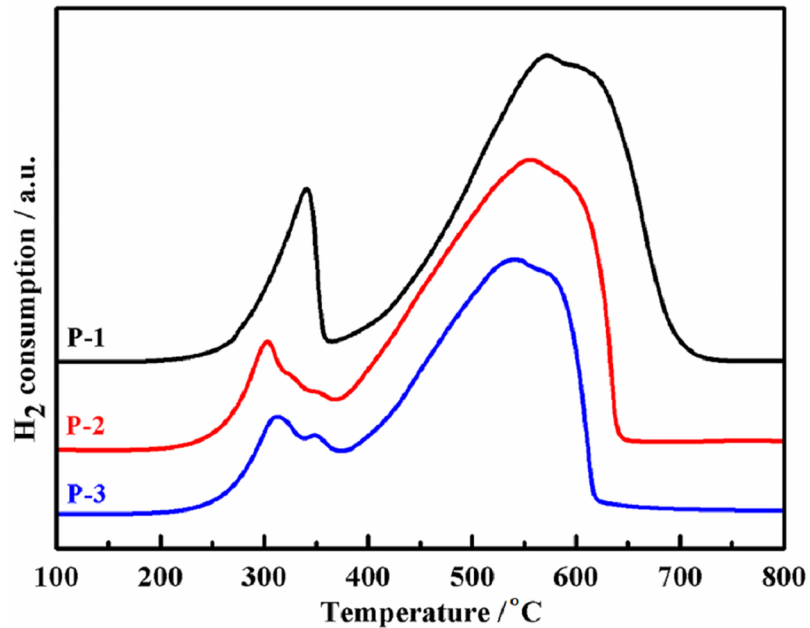

Fig 5. H<sub>2</sub>-TPR profiles of the precursors.

<https://doi.org/10.1371/journal.pone.0182955.g005>

usually induces shrunk surface area as shown in Table 1 [32,35,36]. It leads to decreased Fe dispersity and difficult reduction of iron oxides. Compared with the reduction behavior of the precursors in Fig 5, the corresponding process happened at higher temperature for the catalysts. For C-1, the H<sub>2</sub>-consumption peak at 420°C is from Fe<sub>2</sub>O<sub>3</sub> → Fe<sub>3</sub>O<sub>4</sub>, and the wild peak centered at 570°C is assigned to Fe<sub>3</sub>O<sub>4</sub> → α-Fe. The should peak around 680°C is the

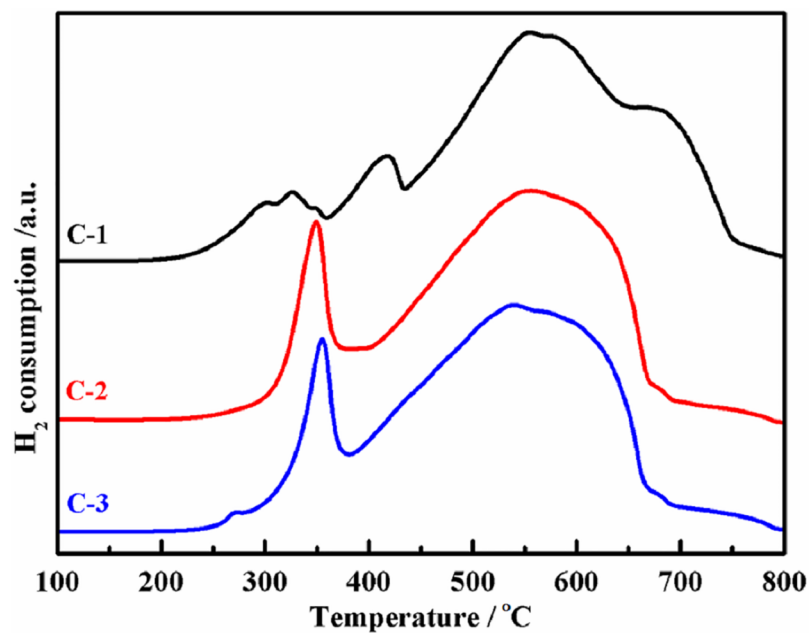

Fig 6. H<sub>2</sub>-TPR profiles of the catalysts.

<https://doi.org/10.1371/journal.pone.0182955.g006>



**Table 2. Reactive performance of the catalysts.**

| Catalyst | CO <sub>2</sub> conv. (%) | Product distribution (C mol. %) |                 |                  |                 |
|----------|---------------------------|---------------------------------|-----------------|------------------|-----------------|
|          |                           | CO                              | CH <sub>4</sub> | C <sub>2-4</sub> | C <sub>5+</sub> |
| C-1      | 10.4                      | 38.1                            | 13.1            | 17.7             | 31.1            |
| C-2      | 13.2                      | 27.0                            | 11.0            | 21.1             | 40.9            |
| C-3      | 15.1                      | 23.4                            | 10.1            | 19.5             | 47.0            |

1.6 MPa, 230°C, 6 L/(h-g-cat.), H<sub>2</sub>/CO<sub>2</sub> = 2

<https://doi.org/10.1371/journal.pone.0182955.t002>

reduction of Fe<sub>3</sub>O<sub>4</sub> covered by K-containing particles as shown in S1 Fig. K can inhibit the reduction of iron oxide by CO [41] and H<sub>2</sub> [35]. The reduction process of iron oxides in C-2 and C-3 are almost same. The peak around 350°C are from highly dispersive Cu<sup>2+</sup> → Cu<sup>0</sup> and Fe<sub>2</sub>O<sub>3</sub> → Fe<sub>3</sub>O<sub>4</sub>. The wide peak of H<sub>2</sub> consumption in 370°C—660°C are from Fe<sub>3</sub>O<sub>4</sub> → α-Fe. The peak temperature of C-2 and C-3 is about 558°C and 537°C, respectively. H<sub>2</sub>-TPR results disclose that C-2 and C-3 are easily reduced relative to C-1.

### Catalyst performance in CO<sub>2</sub> hydrogenation

The influence of Fe<sub>2</sub>O<sub>3</sub> crystal phases on CO<sub>2</sub> hydrogenation is compared in Table 2. The catalytic activity (CO<sub>2</sub> conversion) is proportional to the content of γ-Fe<sub>2</sub>O<sub>3</sub> phase in the catalysts. C-3, composed of pure γ-Fe<sub>2</sub>O<sub>3</sub> phase, is more active than C-1 which is composed of α-Fe<sub>2</sub>O<sub>3</sub>. Because C-2 contains α-Fe<sub>2</sub>O<sub>3</sub> and γ-Fe<sub>2</sub>O<sub>3</sub> simultaneously, its activity is between C-1 and C-3. The higher iron dispersity (Fig 4) and reducibility (Fig 6) of γ-Fe<sub>2</sub>O<sub>3</sub> phase is beneficial to form more active site on C-2 and C-3 for CO<sub>2</sub> hydrogenation than C-1, which results in the activity sequence of C-3 > C-2 > C-1.

In view of CO selectivity, it declines with the increased content of γ-Fe<sub>2</sub>O<sub>3</sub> phase in the catalysts. The selectivity of total hydrocarbons increases in the order of C-1 < C-2 < C-3. Especially, C-3 is the most active among the three catalysts to synthesize C<sub>5+</sub> hydrocarbons. Promoter K is beneficial for CO<sub>2</sub> hydrogenated into hydrocarbons [15] by inhibited H<sub>2</sub> adsorption [20] and enhanced formation rates of C<sub>2+</sub> hydrocarbons [42]. Although the nominal content of K is same for the three catalysts, Fig 4 unveils that the surface content of K on C-2 and C-3 is higher than C-1. The segregation of promoter K on C-2 and C-3 is responsible for the increased selectivity of hydrocarbons, because the surface atoms are the effective ones to influence the reaction.

### Conclusions

The crystal phase of Fe<sub>2</sub>O<sub>3</sub> influences the catalyst reactivity in CO<sub>2</sub> hydrogenation by two effects. The first effect is that the dispersity of both Fe and K on the catalyst in γ-Fe<sub>2</sub>O<sub>3</sub> phase is higher than the catalyst in α-Fe<sub>2</sub>O<sub>3</sub> phase. The second effect is that the catalyst in γ-Fe<sub>2</sub>O<sub>3</sub> phase is more easily reduced than the one in α-Fe<sub>2</sub>O<sub>3</sub> phase. The catalyst with high dispersive and easily reduced iron oxide can form much active site for CO<sub>2</sub> hydrogenation and the high dispersive promoter K can increase the selectivity of C<sub>2+</sub> hydrocarbons.

Aiming to reinforce the conclusion that γ-Fe<sub>2</sub>O<sub>3</sub> phase is better than α-Fe<sub>2</sub>O<sub>3</sub> phase to the Fe catalyst for CO<sub>2</sub> hydrogenation, we are trying to prepare catalysts with similar specific surface area which are in α-Fe<sub>2</sub>O<sub>3</sub> or γ-Fe<sub>2</sub>O<sub>3</sub> phase, respectively. By studying such kind of catalysts, the effect of Fe<sub>2</sub>O<sub>3</sub> crystal phases could be understood directly.

## Supporting information

**S1 Fig. The morphologies of precursors and catalysts observed by SEM.** Every sample was observed under three levels of magnification.

(PDF)

**S2 Fig. Elements distribution on catalyst C-1 observed by EDS.**

(PDF)

## Author Contributions

**Funding acquisition:** Wensheng Ning.

**Investigation:** Tianqi Wang, Hongxian Chen, Xiazhen Yang, Yangfu Jin.

**Methodology:** Wensheng Ning.

**Supervision:** Wensheng Ning.

**Writing – original draft:** Wensheng Ning.

**Writing – review & editing:** Wensheng Ning.

## References

1. Hardy DR, Coffey T. Process and system for producing synthetic liquid hydrocarbon fuels, U.S. Patent 7420004, B2, 2008.
2. Willauer HD, DiMascio F, Hardy DR, Lewis MK, Williams FW. Development of an electrochemical acidification cell for the recovery of CO<sub>2</sub> and H<sub>2</sub> from seawater. *Ind Eng Chem Res.* 2011; 50: 9876–9882.
3. Willauer HD, DiMascio F, Hardy DR, Lewis MK, Williams FW. Development of an electrochemical acidification cell for the recovery of CO<sub>2</sub> and H<sub>2</sub> from seawater II. Evaluation of the cell by natural seawater. *Ind Eng Chem Res.* 2012; 51: 11254–11260.
4. Willauer HD, DiMascio F, Hardy DR, Williams FW. Feasibility of CO<sub>2</sub> extraction from seawater and simultaneous hydrogen gas generation using a novel and robust electrolytic cation exchange module based on continuous electrodeionization technology. *Ind Eng Chem Res.* 2014; 53: 12192–12200.
5. Wang W, Wang S, Ma X, Gong J. Recent advances in catalytic hydrogenation of carbon dioxide. *Chem Soc Rev.* 2011; 40: 3703–3727. <https://doi.org/10.1039/c1cs15008a> PMID: 21505692
6. Saeidi S, Amin NAS, Rahimpour MR. Hydrogenation of CO<sub>2</sub> to value-added products—A review and potential future developments. *J CO<sub>2</sub> Util.* 2014; 5: 66–81.
7. Lan BY, Shi HF. Review of systems for photocatalytic conversion of CO<sub>2</sub> to hydrocarbon fuels. *Acta Phys-Chim Sin.* 2014; 30: 2177–2196.
8. Drab DM, Willauer HD, Olsen MT, Ananth R, Mushrush GW, Baldwin JW, et al. Hydrocarbon synthesis from carbon dioxide and hydrogen: A two-step process. *Energy Fuels.* 2013; 27: 6348–6354.
9. Nozaki F, Sodesawa T, Satoh S, Kimura K. Hydrogenation of carbon dioxide into light hydrocarbons at atmospheric pressure over Rh/Nb<sub>2</sub>O<sub>5</sub> or Cu/SiO<sub>2</sub>-Rh/Nb<sub>2</sub>O<sub>5</sub> catalyst. *J Catal.* 1987; 104: 339–346.
10. Lee MD, Lee JF, Chang CS. Hydrogenation of carbon-dioxide on unpromoted and potassium-promoted iron catalysts. *Bull Chem Soc Jpn.* 1989; 62: 2756–2758.
11. Schild C, Wokaun A, Koepfel RA, Baiker A. CO<sub>2</sub> hydrogenation over Nickel/Zirconia catalysts from amorphous precursors: On the mechanism of methane formation. *J Phys Chem.* 1991; 95: 6341–6346.
12. Williams KJ, Boffa AB, Salmeron M, Bell AT, Somorjai GA. The kinetics of CO<sub>2</sub> hydrogenation on a Rh foil promoted by titania overlays. *Catal Lett.* 1991; 9: 415–426.
13. Ando H, Xu Q, Fujiwara M, Matsumura Y, Tanaka M, Souma Y. Hydrocarbon synthesis from CO<sub>2</sub> over Fe-Cu catalysts. *Cata. Today.* 1998; 45: 229–234.
14. Jun KW, Roh HS, Kim KS, Ryu JS, Lee KW. Catalytic investigation for Fischer–Tropsch synthesis from bio-mass derived syngas. *Appl Catal A.* 2004; 259: 221–226.
15. Riedel T, Claeys M, Schulz H, Schaub G, Nam SS, Jun KW, et al. Comparative study of Fischer–Tropsch synthesis with H<sub>2</sub>/CO and H<sub>2</sub>/CO<sub>2</sub> syngas using Fe- and Co-based catalysts. *Appl Catal A.* 1999; 186: 201–213.

16. Zhang Y, Jacobs G, Sparks DE, Dry ME, Davis BH. CO and CO<sub>2</sub> hydrogenation study on supported cobalt Fischer–Tropsch synthesis catalysts. *Catal Today*. 2002; 71: 411–418.
17. Rohde MP, Unruh D, Schaub G. Membrane application in Fischer-Tropsch synthesis to enhance CO<sub>2</sub> hydrogenation. *Ind Eng Chem Res*. 2005; 44: 9653–9658.
18. Song C. Global challenges and strategies for control, conversion and utilization of CO<sub>2</sub> for sustainable development involving energy, catalysis, adsorption and chemical processing. *Catal Today*. 2006; 115: 2–32.
19. Ning W, Koizumi N, Yamada M. Researching Fe catalyst suitable for CO<sub>2</sub>-containing syngas for Fischer-Tropsch synthesis. *Energy Fuels*. 2009; 23: 4696–4700.
20. Dorner RW, Hardy DR, Williams FW, Willauer HD. K and Mn doped iron-based CO<sub>2</sub> hydrogenation catalysts: Detection of KAlH<sub>4</sub> as part of the catalyst's active phase. *Appl Catal A*. 2010; 373: 112–121.
21. Al-Dossary M, Ismail AA, Fierroa JLG, Bouzid H, Al-Sayari SA. Effect of Mn loading onto MnFeO nano-composites for the CO<sub>2</sub> hydrogenation reaction. *Appl Catal B*. 2015; 165: 651–660.
22. Dorner RW, Hardy DR, Williams FW, Willauer HD. C<sub>2</sub>-C<sub>5+</sub> olefin production from CO<sub>2</sub> hydrogenation using ceria modified Fe/Mn/K catalysts. *Catal Commun*. 2011; 15: 88–92.
23. Saththawong R, Koizumi N, Song C, Prasassarakich P. Light olefin synthesis from CO<sub>2</sub> hydrogenation over K-promoted Fe–Co bimetallic catalysts. *Catal Today*. 2015; 251: 34–40.
24. Mattia D, Jones MD, O'Byrne JP, Griffiths OG, Owen RE, Sackville E, et al. Towards Carbon-Neutral CO<sub>2</sub> conversion to hydrocarbons. *ChemSusChem* 2015; 8: 4064–4072. <https://doi.org/10.1002/cssc.201500739> PMID: 26564267
25. Wei J, Ge Q, Yao R, Wen Z, Fang C, Guo L, et al. Directly converting CO<sub>2</sub> into a gasoline fuel. *Nature Commun*. 2017; 8: 15174. <https://doi.org/10.1038/ncomms15174> PMID: 28462925
26. Albrechta M, Rodemercka U, Schneidera M, Bröring M, Baabe D, Kondratenko EV. Unexpectedly efficient CO<sub>2</sub> hydrogenation to higher hydrocarbons over non-doped Fe<sub>2</sub>O<sub>3</sub>. *Appl Catal B*. 2017; 204: 119–126.
27. Li S-S, Li W-J, Jiang T-J, Liu Z-G, Chen X, Cong H-P, et al. Iron oxide with different crystal phases ( $\alpha$ - and  $\gamma$ -Fe<sub>2</sub>O<sub>3</sub>) in electroanalysis and ultrasensitive and selective detection of lead(II): An advancing approach using XPS and EXAFS. *Anal Chem*. 2016; 88: 906–914. <https://doi.org/10.1021/acs.analchem.5b03570> PMID: 26639029
28. Zhu W, Winterstein J, Maimon I, Yin Q, Yuan L, Kolmogorov AN, et al. Atomic structural evolution during the reduction of  $\alpha$ -Fe<sub>2</sub>O<sub>3</sub> nanowires. *J Phys Chem C*. 2016; 120: 14854–14862.
29. Apte SK, Naik SD, Sonawane RS, Kale BB. Synthesis of nanosize-necked structure  $\alpha$ - and  $\gamma$ -Fe<sub>2</sub>O<sub>3</sub> and its Photocatalytic Activity. *J Am Ceram Soc*. 2007; 90: 412–414.
30. Liu C, Yang S, Ma L, Peng Y, Hamidreza A, Chang H, et al. Comparison on the performance of  $\alpha$ -Fe<sub>2</sub>O<sub>3</sub> and  $\gamma$ -Fe<sub>2</sub>O<sub>3</sub> for selective catalytic reduction of nitrogen oxides with ammonia. *Catal Lett*. 2013; 143: 697–704.
31. Ma HQ, Zhang JY, Tan X, Zhang L, Wang RJ, Zhang BF. Study on the preparation of Fe-based high temperature shift catalyst by Mössbauer spectroscopy I. The phase transformation of different iron oxide precursors. *Chin J Catal*. 1995; 16: 365–370.
32. Chen HX, Ning WS, Chen CH, Zhang T. Influence of Fe<sub>2</sub>O<sub>3</sub> crystal phase on the performance of Fe-based catalysts for CO<sub>2</sub> hydrogenation. *J Fuel Chem Technol*. 2015; 43: 1387–1392.
33. Keyvanloo K, Mardkhe MK, Alam TM, Bartholomew CH, Woodfield BF, Hecker WC. Supported iron Fischer–Tropsch catalyst: Superior activity and stability using a thermally stable silica-doped alumina support. *ACS Catal*. 2014; 4: 1071–1077.
34. Scherer GW. Theory of drying. *J Amer Ceram Soc*. 1990; 73: 3–14.
35. Yang Y, Xiang HW, Xu YY, Bai L, Li YW. Effect of potassium promoter on precipitated iron-manganese catalyst for Fischer–Tropsch synthesis. *Appl Catal A*. 2004; 266: 181–194.
36. Ning W, Shen H, Jin Y, Yang X. Effects of weak surface modification on Co/SiO<sub>2</sub> catalyst for Fischer-Tropsch reaction. *PLoS ONE*. 2015; 10: e0124228 <https://doi.org/10.1371/journal.pone.0124228> PMID: 25938725
37. Dry ME, Shingles T, Boshoff LJ, Oosthuizen GJ. Heats of chemisorption on promoted iron surfaces and the role of alkali in Fischer-Tropsch synthesis. *J Catal*. 1969; 15: 190–199.
38. Wan H, Wu B, An X, Tao Z, Li T, Xiang H, et al. Structural properties, reduction and carburization behaviors of Fe/Cu/K/Al<sub>2</sub>O<sub>3</sub> catalyst for Fischer-Tropsch synthesis. *Acta Phys-Chim Sin*. 2007; 23: 1151–1156.
39. Ning W, Yang X, Yamada M. Influence of palladium on the hydrocarbon distribution of Fischer-Tropsch reaction over precipitated iron catalyst. *Curr Catal*. 2012; 1: 88–92.

40. Genuzio F, Sala A, Schmidt T, Menzel D, Freund HJ. Phase transformations in thin iron oxide films: Spectromicroscopic study of velocity and shape of the reaction fronts. *Surf Sci.* 2016; 648: 177–187.
41. Ning WS, Koizumi N, Yamada M. Improvement of promoters on the Fischer–Tropsch activity of mechanically mixed Fe catalysts. *Catal Commun.* 2007; 8: 275–278.
42. Dictor RA, Bell AT. Fischer-Tropsch synthesis over reduced and unreduced iron oxide catalysts. *J Catal.* 1986; 97: 121–136.
